# Supplementary material
Source: PubMed Central journal article supplement (PMC547826)

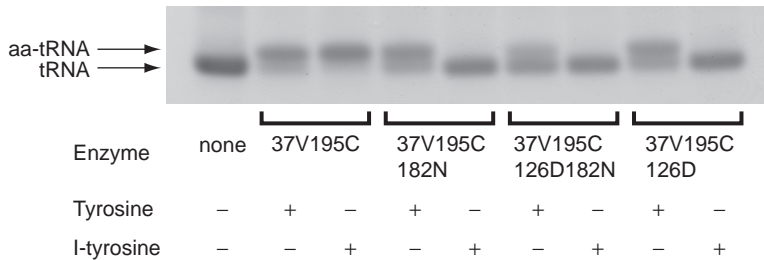

Supplement: pnas_102_5_1366__1.pdf [file pnas_102_5_1366__1.pdf]

A

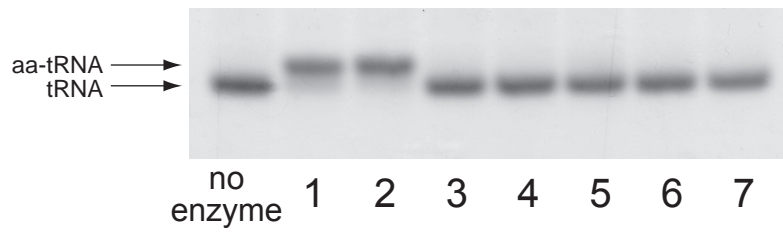

B

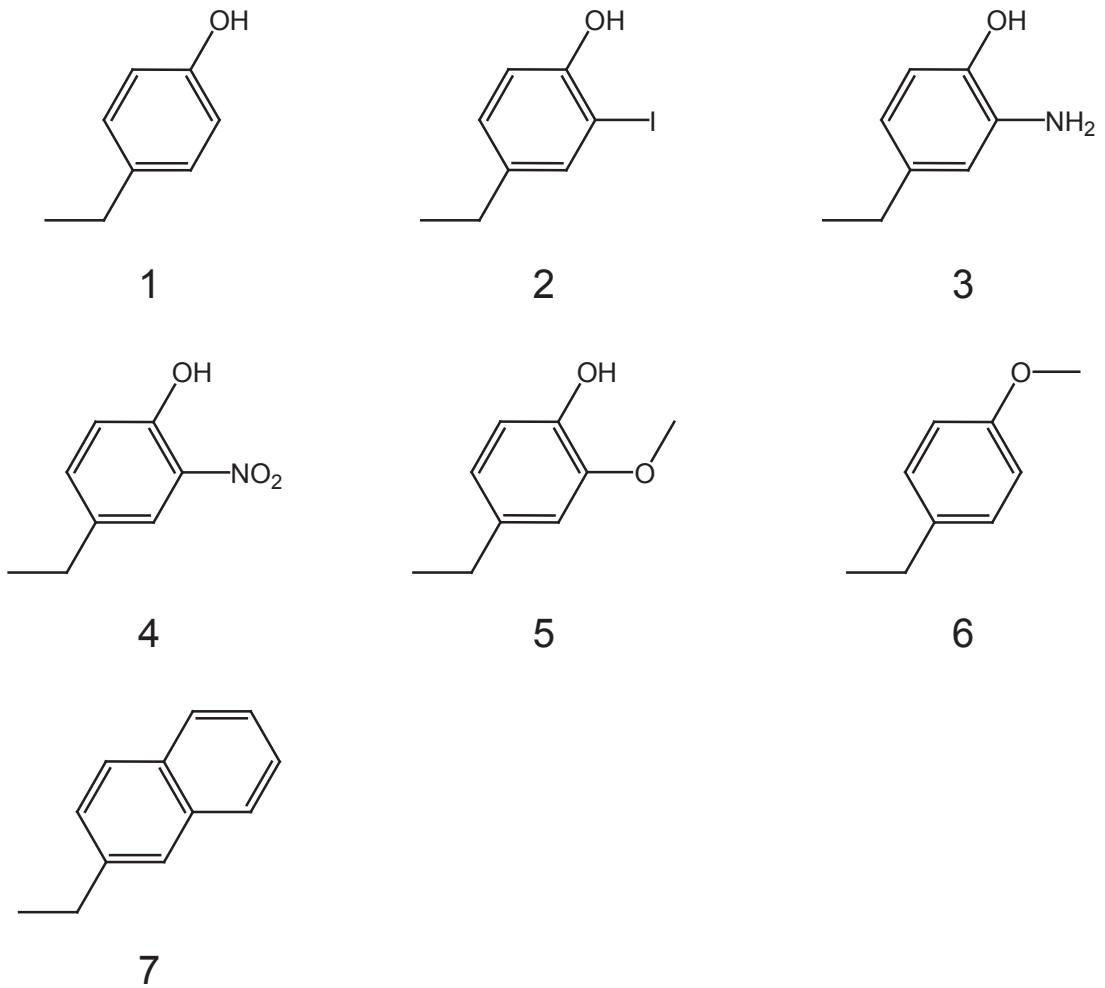

Supplement: pnas_102_5_1366__2.pdf [file pnas_102_5_1366__2.pdf]
